# Supplementary material for: Is Lutikizumab, an Anti–Interleukin‐1 α / β Dual Variable Domain Immunoglobulin, efficacious for Osteoarthritis? Results from a bayesian network meta‐analysis
Source: Hindawi journal article supplement (doi:10.1155/2020/9013283), 2020-01-01
Supplement: f1 [file 9013283.f1.zip]

**Supplementary appendix Table 4.** The details of SURCA and mean rank of safety endpoints.

| Treatment | OR (95%CI)<br>for withdrawal due<br>to AEs | SURCA for<br>withdrawal due to<br>AEs, % | Mean rank for<br>withdrawal due to<br>AEs | OR (95%CI)<br>for serious AEs | SURCA<br>for serious AEs, % | Mean rank for<br>serious AEs | OR (95%CI)<br>for any<br>drug-related AEs | SURCA<br>for any<br>drug-related<br>AEs, % | Mean rank for any<br>drug-related AEs |
|-----------|--------------------------------------------|------------------------------------------|-------------------------------------------|-------------------------------|-----------------------------|------------------------------|-------------------------------------------|--------------------------------------------|---------------------------------------|
| Placebo   | Reference                                  | 80.6                                     | 2                                         | Reference                     | 52.0                        | 3.4                          | Reference                                 | 89.0                                       | 1.6                                   |
| ALI       | 0.36 (-0.43 to 1.15)                       | 54.1                                     | 3.3                                       | -0.55 (-1.60 to<br>0.50)      | 54.2                        | 3.3                          | 0.15 (-0.63 to 0.93)                      | 64.6                                       | 2.8                                   |
| SCI       | -0.11 (-0.40 to<br>0.17)                   | 92.6                                     | 1.4                                       | -0.01 (-0.70 to<br>0.68)      | 80.2                        | 2.0                          | 0.07 (-0.10 to 0.24)                      | 75.5                                       | 2.2                                   |
| DUL       | 1.08 (0.60 to 1.56)                        | 8.5                                      | 5.6                                       | 0.03 (-1.19 to 1.25)          | 48.6                        | 3.6                          | 0.59 (0.36 to 0.82)                       | 19.7                                       | 5.0                                   |
| NSA       | 0.38 (0.12 to 0.64)                        | 49.4                                     | 3.5                                       | 0.48 (-0.12 to 1.08)          | 14.6                        | 5.3                          | 0.35 (0.19 to 0.51)                       | 45.1                                       | 3.7                                   |
| OPI       | 0.95 (0.57 to 1.33)                        | 14.8                                     | 5.3                                       | 0.01 (-2.57 to 2.59)          | 50.4                        | 3.5                          | 0.74 (0.46 to 1.03)                       | 6.2                                        | 5.7                                   |
