# Supplementary material for: Is Lutikizumab, an Anti–Interleukin‐1 α / β Dual Variable Domain Immunoglobulin, efficacious for Osteoarthritis? Results from a bayesian network meta‐analysis
Source: Hindawi journal article supplement (doi:10.1155/2020/9013283), 2020-01-01
Supplement: f1 [file 9013283.f1.zip]

**Supplementary appendix Table 3.** The details of SURCA and mean rank of efficacy endpoints.

| Treatment | SMD (95%CI)<br>for pain relief | SURCA for pain<br>relief, % | Mean rank for pain<br>relief | SMD (95%CI)<br>for Function<br>imrovement | SURCA<br>for Function<br>imrovement, % | Mean rank for<br>Function<br>imrovement |
|-----------|--------------------------------|-----------------------------|------------------------------|-------------------------------------------|----------------------------------------|-----------------------------------------|
| Placebo   | Reference                      | 8.2                         | 5.6                          | Reference                                 | 10.4                                   | 5.5                                     |
| ALI       | 1.11 (-2.29 to 4.52)           | 28.6                        | 4.6                          | 0.99 (-2.27 to 4.25)                      | 29.6                                   | 4.5                                     |
| SCI       | 4.23 (2.70 to 5.76)            | 84.4                        | 1.8                          | 3.94 (2.48 to 5.40)                       | 88.4                                   | 1.6                                     |
| DUL       | 4.76 (2.35 to 7.17)            | 88.7                        | 1.6                          | 3.45 (1.15 to 5.76)                       | 74                                     | 2.3                                     |
| NSA       | 2.89 (1.65 to 4.13)            | 54.1                        | 3.3                          | 3.15 (1.94 to 4.36)                       | 66.6                                   | 2.7                                     |
| OPI       | 1.65 (-1.53 to 4.83)           | 36.0                        | 4.2                          | 1.12 (-1.92 to 4.17)                      | 31                                     | 4.4                                     |
