# Supplementary material for: Is Lutikizumab, an Anti–Interleukin‐1 α / β Dual Variable Domain Immunoglobulin, efficacious for Osteoarthritis? Results from a bayesian network meta‐analysis
Source: Hindawi journal article supplement (doi:10.1155/2020/9013283), 2020-01-01
Supplement: f1 [file 9013283.f1.zip]

**Supplementary appendix Table 5.** The details of results and SURCA for subgroup analyses.

| Subgroup analysis                               | Treatment | SMD (95% CI)<br>for pain relief | SURCA<br>for pain relief , % | SMD (95% CI)<br>for function<br>improvement | SURCA<br>for function<br>improvement, % | OR (95% CI)<br>for withdral due<br>to AEs | SURCA<br>for withdrawal<br>due to AEs, % | OR (95% CI)<br>for serious AEs<br>or death | SURCA<br>for Serious AEs<br>or death, % | OR (95% CI)<br>for any<br>drug-related AEs | SURCA<br>for any<br>drug-related<br>AEs, % |
|-------------------------------------------------|-----------|---------------------------------|------------------------------|---------------------------------------------|-----------------------------------------|-------------------------------------------|------------------------------------------|--------------------------------------------|-----------------------------------------|--------------------------------------------|--------------------------------------------|
| Subgroup of<br>different drug<br>delivery route | PLA       | Reference                       | 8.1                          | Reference                                   | 10.1                                    | Reference                                 | 79.6                                     | Reference                                  | 56.2                                    | Reference                                  | 86.9                                       |
|                                                 | ALI       | 1.11 (-2.32 to<br>4.55)         | 27.2                         | 0.99 (-2.24 to<br>4.21)                     | 28.2                                    | 0.36 (-0.43 to<br>1.15)                   | 53.6                                     | -0.55 (-1.60 to<br>0.50)                   | 81.9                                    | 0.15 (-0.63 to<br>0.93)                    | 79.3                                       |
|                                                 | SCI       | 4.48 (2.89 to<br>6.06)          | 85.8                         | 4.19 (2.70 to<br>5.68)                      | 88.9                                    | -0.14 (-0.44 to<br>0.15)                  | 93.5                                     | 0.14 (-0.62 to<br>0.89)                    | 47.0                                    | 0.06 (-0.11 to<br>0.23)                    | 73.8                                       |
|                                                 | DLU       | 4.76 (2.33 to<br>7.19)          | 85.7                         | 3.45 (1.17 to<br>5.73)                      | 70.1                                    | 1.08 (0.60 to<br>1.56)                    | 6.5                                      | 0.03 (-1.19 to<br>1.25)                    | 51.7                                    | 0.59 (0.36 to<br>0.82)                     | 10.7                                       |
|                                                 | NSA       | 3.29 (1.90 to<br>4.69)          | 58.0                         | 3.57 (2.23 to<br>4.92)                      | 72.0                                    | 0.34 (0.07 to<br>0.61)                    | 50.0                                     | 0.63 (-0.05 to<br>1.32)                    | 12.3                                    | 0.34 (0.17 to<br>0.50)                     | 31.5                                       |
|                                                 | OPI       | 1.72 (-1.49 to<br>4.93)         | 35.3                         | 1.19 (-1.82 to<br>4.21)                     | 30.7                                    | 0.94 (0.56 to<br>1.32)                    | 16.8                                     | 0.05 (-2.53 to<br>2.63)                    | 50.9                                    | 0.74 (0.46 to<br>1.02)                     | 17.8                                       |

Subgroup of  
different diseased  
joint

|     |                         |      |                         |      |                          |      |                          |      |                         |      |
|-----|-------------------------|------|-------------------------|------|--------------------------|------|--------------------------|------|-------------------------|------|
| PLA | Reference               | 7.7  | Reference               | 9.2  | Reference                | 76.4 | Reference                | 53.4 | Reference               | 85.2 |
| ALI | 1.87 (-3.00 to<br>6.74) | 38.7 | 1.71 (-2.91 to<br>6.34) | 40.1 | 0.17 (-0.73 to<br>1.07)  | 63.6 | -0.78 (-2.02 to<br>0.46) | 85.3 | 0.04 (-1.06 to<br>1.13) | 68.1 |
| SCI | 4.35 (2.79 to<br>5.90)  | 82.4 | 4.07 (2.59 to<br>5.55)  | 86   | -0.13 (-0.42 to<br>0.16) | 91   | 0.07 (-0.68 to<br>0.81)  | 50.2 | 0.05 (-0.12 to<br>0.22) | 75.0 |
| DLU | 4.76 (2.32 to<br>7.20)  | 85.4 | 3.45 (1.14 to<br>5.76)  | 69.5 | 1.08 (0.60 to<br>1.56)   | 7.3  | 0.03 (-1.19 to<br>1.25)  | 48.9 | 0.59 (0.36 to<br>0.82)  | 20.1 |
| NSA | 3.08 (1.78 to<br>4.37)  | 52.4 | 3.36 (2.10 to<br>4.63)  | 66   | 0.35 (0.09 to<br>0.62)   | 47   | 0.56 (-0.11 to<br>1.23)  | 13.1 | 0.33 (0.16 to<br>0.49)  | 45.3 |
| OPI | 1.69 (-1.53 to<br>4.90) | 33.4 | 1.16 (-1.90 to<br>4.22) | 29.2 | 0.94 (0.57 to<br>1.32)   | 14.7 | 0.03 (-2.55 to<br>2.61)  | 49.0 | 0.74 (0.45 to<br>1.02)  | 4.2  |
