# Supplementary material for: Is Lutikizumab, an Anti–Interleukin‐1 α / β Dual Variable Domain Immunoglobulin, efficacious for Osteoarthritis? Results from a bayesian network meta‐analysis
Source: Hindawi journal article supplement (doi:10.1155/2020/9013283), 2020-01-01
Supplement: f1 [file 9013283.f1.zip]

**Supplementary appendix Table 1.** Baseline Characteristics of included Studies

| Author                 | No. | Year | Number of patients | Mean age | Gender ratio (Male/Female) | Drug delivery route | Diseased joint | Funded or Sponsored | Experimental intervention | Control intervention I | Control intervention II | Follow-up period, days |
|------------------------|-----|------|--------------------|----------|----------------------------|---------------------|----------------|---------------------|---------------------------|------------------------|-------------------------|------------------------|
| Zacher J et al [31].   | 1   | 2003 | 516                | 63.05    | 101/415                    | Oral                | Hip and Knee   | Yes                 | Etoricoxib                | Diclofenac             | /                       | 42                     |
| Puopolo A et al [32].  | 2   | 2007 | 548                | 62.56    | 133/415                    | Oral                | Hip and Knee   | No                  | Placebo                   | Etoricoxib             | Ibuprofen               | 84                     |
| Prior MJ et al [33].   | 3   | 2014 | 542                | 61.70    | 139/403                    | Oral                | Hip and Knee   | No                  | Acetaminophen             | Placebo                | /                       | 84                     |
| Emery P et al [34].    | 4   | 2008 | 248                | 64.02    | 134/114                    | Oral                | Hip            | Yes                 | Celecoxib                 | Diclofenac             | /                       | 84                     |
| McKenna F et al [35].  | 5   | 2001 | 600                | 61.67    | 208/392                    | Oral                | Knee           | Yes                 | Placebo                   | Celecoxib              | Diclofenac              | 42                     |
| Altman RD et al [36].  | 6   | 2015 | 385                | 64.13    | 89/296                     | Topical             | Hand           | No                  | Diclofenac                | Placebo                | /                       | 56                     |
| Bookman AA et al [37]. | 7   | 2004 | 248                | 61.80    | 91/157                     | Topical             | Knee           | No                  | Diclofenac                | Vehicle                | Placebo                 | 28                     |
| Gibofsky A et al [38]. | 8   | 2014 | 305                | 61.63    | 102/203                    | Oral                | Hip and Knee   | Yes                 | Diclofenac                | Placebo                | /                       | 84                     |
| Essex MN et al [39].   | 9   | 2016 | 367                | 64.77    | 120/247                    | Oral                | Knee           | Yes                 | Celecoxib                 | Naproxen               | Placebo                 | 42                     |
| Reed K et al [40].     | 10  | 2018 | 676                | 60.77    | 251/425                    | Oral                | Hip and Knee   | Yes                 | Paracetamol               | Placebo                | /                       | 84                     |

|                               |    |      |      |       |         |           |              |     |            |             |          |     |
|-------------------------------|----|------|------|-------|---------|-----------|--------------|-----|------------|-------------|----------|-----|
| Essex MN et al<br>[41].       | 11 | 2012 | 589  | 60.38 | 199/390 | Oral      | Knee         | Yes | Celecoxib  | Naproxen    | /        | 180 |
| Leung AT et al<br>[42].       | 12 | 2002 | 501  | 63.16 | 109/392 | Oral      | Hip and Knee | Yes | Placebo    | Etoricoxib  | Naproxen | 84  |
| Gordo AC et al<br>[43].       | 13 | 2016 | 388  | 62.95 | 106/282 | Oral      | Knee         | Yes | Celecoxib  | Ibuprofen   | Placebo  | 42  |
| Niethard FU et al<br>[44].    | 14 | 2005 | 237  | 66.00 | 87/150  | Topical   | Knee         | No  | Diclofenac | Placebo     | /        | 21  |
| DeLemos BP et<br>al [45].     | 15 | 2011 | 1001 | 60.02 | 369/632 | Oral      | Hip and Knee | Yes | Tramadol   | Celecoxib   | Placebo  | 84  |
| Reginster JY et<br>al [46].   | 16 | 2006 | 997  | 62.77 | 279/718 | Oral      | Hip and Knee | No  | Placebo    | Etoricoxib  | Naproxen | 84  |
| Reginster JY et<br>al [46].   | 17 | 2006 | 463  | 65.70 | 116/347 | Oral      | Hip and Knee | No  | Etoricoxib | Naproxen    | /        | 280 |
| Gana TJ et al<br>[47].        | 18 | 2006 | 1011 | 58.15 | 380/631 | Oral      | Hip and Knee | Yes | Placebo    | Tramadol    | /        | 84  |
| Svensson O et al<br>[48].     | 19 | 2006 | 156  | 58.66 | 49/107  | Oral      | Hip          | Yes | Naproxen   | Placebo     | /        | 42  |
| Svensson O et al<br>[48].     | 20 | 2006 | 355  | 60.11 | 84/271  | Oral      | Knee         | Yes | Naproxen   | Placebo     | /        | 42  |
| Fleischmann RM<br>et al [49]. | 21 | 2019 | 347  | 60.11 | 122/225 | Injective | Knee         | Yes | Placebo    | Lutikizumab | /        | 364 |
| Kloppenborg M<br>et al [50].  | 22 | 2018 | 131  | 66    | 20/111  | Injective | Hand         | Yes | Placebo    | Lutikizumab | /        | 182 |

|                            |    |      |     |       |        |      |              |     |            |            |   |     |
|----------------------------|----|------|-----|-------|--------|------|--------------|-----|------------|------------|---|-----|
| Chappell AS et al<br>[51]. | 23 | 2011 | 256 | 62.55 | 61/195 | Oral | Knee         | Yes | Placebo    | Duloxetine | / | 91  |
| Uchio Y et al<br>[52].     | 24 | 2018 | 353 | 65.58 | 79/264 | Oral | Knee         | Yes | Placebo    | Duloxetine | / | 126 |
| Chappell AS et al<br>[53]. | 25 | 2009 | 231 | 62.31 | 60/151 | Oral | Knee         | Yes | Duloxetine | Placebo    | / | 84  |
| Wang G et al<br>[54].      | 26 | 2016 | 407 | 60.51 | 96/311 | Oral | Hip and Knee | Yes | Placebo    | Duloxetine | / | 91  |

---
