# Supplementary material for: Is Lutikizumab, an Anti–Interleukin‐1 α / β Dual Variable Domain Immunoglobulin, efficacious for Osteoarthritis? Results from a bayesian network meta‐analysis
Source: Hindawi journal article supplement (doi:10.1155/2020/9013283), 2020-01-01
Supplement: f1 [file 9013283.f1.zip]

**Supplementary appendix Table 2.** Methodological quality and risk of bias evaluation.

| Author                 | 1.Sequence generation | 2.Allocation concealment | 3.Blinding       | 4.Incomplete outcome data | 5.Selective outcome reporting | 6.Other source of bias |
|------------------------|-----------------------|--------------------------|------------------|---------------------------|-------------------------------|------------------------|
| Zacher J et al [31].   | Low risk of bias      | Low risk of bias         | Low risk of bias | Low risk of bias          | Low risk of bias              | Unclear risk of bias   |
| Puopolo A et al [32].  | Low risk of bias      | Low risk of bias         | Low risk of bias | Low risk of bias          | Low risk of bias              | Unclear risk of bias   |
| Prior MJ et al [33].   | Low risk of bias      | Low risk of bias         | Low risk of bias | Low risk of bias          | Low risk of bias              | Unclear risk of bias   |
| Emery P et al [34].    | Low risk of bias      | Low risk of bias         | Low risk of bias | Low risk of bias          | Low risk of bias              | Unclear risk of bias   |
| McKenna F et al [35].  | Low risk of bias      | Low risk of bias         | Low risk of bias | Low risk of bias          | Low risk of bias              | Unclear risk of bias   |
| Altman RD et al [36].  | Unclear risk of bias  | Low risk of bias         | Low risk of bias | Low risk of bias          | Low risk of bias              | Unclear risk of bias   |
| Bookman AA et al [37]. | Unclear risk of bias  | Low risk of bias         | Low risk of bias | Low risk of bias          | Low risk of bias              | Unclear risk of bias   |
| Gibofsky A et al [38]. | Unclear risk of bias  | Low risk of bias         | Low risk of bias | Low risk of bias          | Low risk of bias              | Unclear risk of bias   |



|                             |                      |                      |                  |                  |                  |                      |
|-----------------------------|----------------------|----------------------|------------------|------------------|------------------|----------------------|
| Gana TJ et al [47].         | Low risk of bias     | Low risk of bias     | Low risk of bias | Low risk of bias | Low risk of bias | Low risk of bias     |
| Svensson O et al [48].      | Unclear risk of bias | Unclear risk of bias | Low risk of bias     |
| Svensson O et al [48].      | Unclear risk of bias | Unclear risk of bias | Low risk of bias     |
| Fleischmann RM et al [49].  | Unclear risk of bias | Unclear risk of bias | Low risk of bias | Low risk of bias | Low risk of bias | Unclear risk of bias |
| Kloppenburger M et al [50]. | Unclear risk of bias | Unclear risk of bias | Low risk of bias | Low risk of bias | Low risk of bias | Unclear risk of bias |
| Chappell AS et al [51].     | Low risk of bias     | Unclear risk of bias | Low risk of bias | Low risk of bias | Low risk of bias | Unclear risk of bias |
| Uchio Y et al [52].         | Low risk of bias     | Unclear risk of bias | Low risk of bias | Low risk of bias | Low risk of bias | Unclear risk of bias |
| Chappell AS et al [53].     | Low risk of bias     | Low risk of bias     | Low risk of bias | Low risk of bias | Low risk of bias | Unclear risk of bias |
| Wang G et al [54].          | Low risk of bias     | High risk of bias    | Low risk of bias | Low risk of bias | Low risk of bias | Unclear risk of bias |

---
