# Supplementary material for: Is Lutikizumab, an Anti–Interleukin-1α/β Dual Variable Domain Immunoglobulin, efficacious for Osteoarthritis? Results from a bayesian network meta-analysis
Source: Biomed Res Int. 2020 Nov 4;2020:9013283. doi: 10.1155/2020/9013283 (PMC7661137; doi:10.1155/2020/9013283)
Supplement: Supplementary Materials — The Supplementary Material includes 5 supplementary appendix tables and 2 supplementary appendix figures which support our findings. [file 9013283.f1.zip]

Archive with 7 entries (7 files):
- 9013283.f1.pdf
- 9013283.f2.pdf
- 9013283.f3.pdf
- 9013283.f4.pdf
- 9013283.f5.pdf
- 9013283.f6.pdf
- 9013283.f7.pdf
