# Supplementary figures and images for: Is Lutikizumab, an Anti–Interleukin‐1 α / β Dual Variable Domain Immunoglobulin, efficacious for Osteoarthritis? Results from a bayesian network meta‐analysis
Source: Hindawi journal article supplement (doi:10.1155/2020/9013283), 2020-01-01

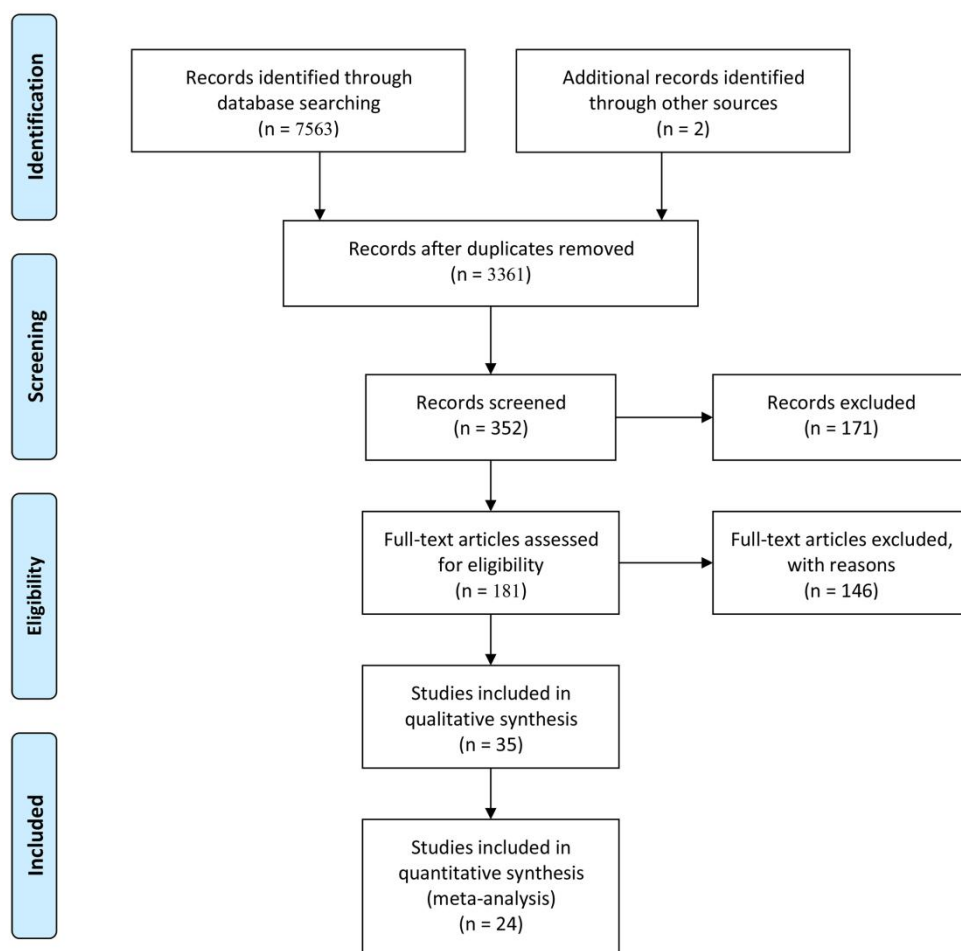

**Supplementary appendix Figure 1. PRISMA Flow Diagram.**

Supplement: f1 [file 9013283.f1.zip]
